# Supplementary material for: Visible light-activated photocatalytic activity of TiO2–crystal violet based superhydrophobic paint against VOCs in indoor air
Source: Royal Society of Chemistry journal article supplement (doi:10.1039/d2va00120a), 2022-11-02
Supplement: d2va00120a1.pdf [file d2va00120a1.pdf]

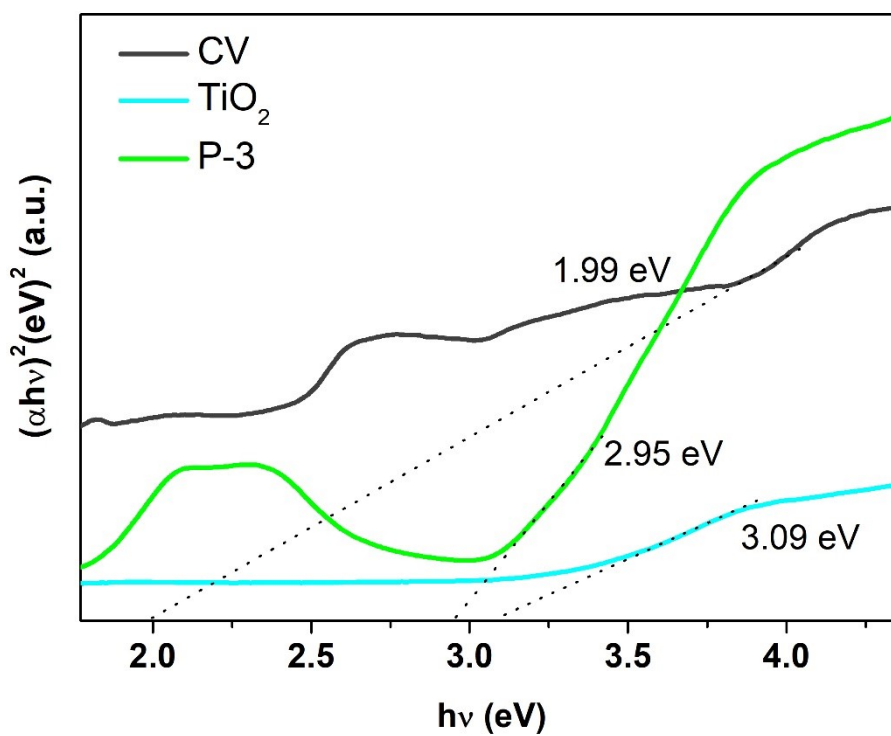

**Figure S1.** The converted Tauc plot of  $(\alpha h\nu)_2$  versus photon energy ( $h\nu$ ) of CV,  $\text{TiO}_2$  and P-3 photocatalysts.

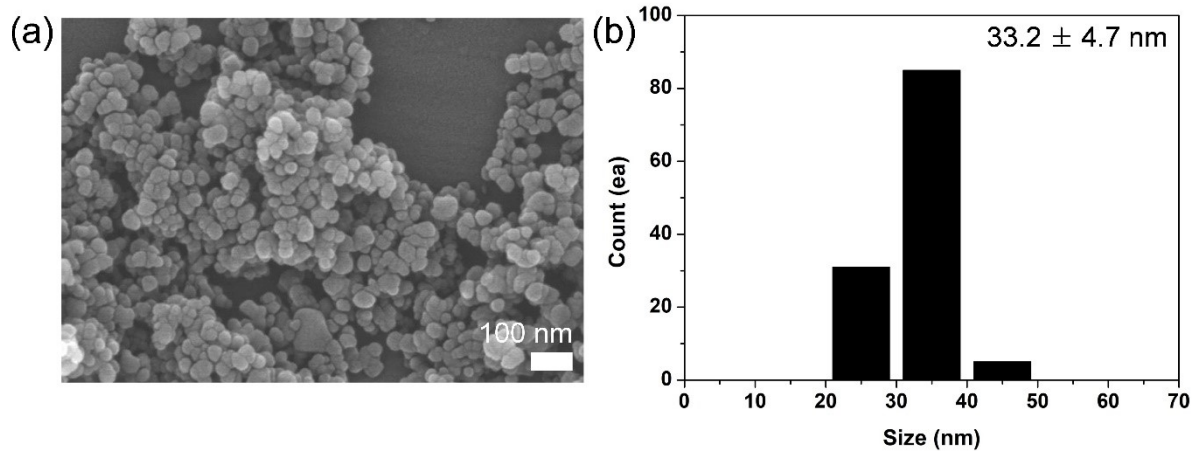

**Figure S2.** (a) SEM image and (b) the corresponding size-distributions of the P-3 photocatalyst.
